# Supplementary material for: Lung Ultrasound Patterns and Clinical-Laboratory Correlates during COVID-19 Pneumonia: A Retrospective Study from North East Italy
Source: PubMed Central journal article supplement (PMC8004000; doi:10.3390/jcm10061288), 2021-03-20
Supplement: jcm-10-01288-s001.pdf [file jcm-10-01288-s001.pdf]

**Table S1.** Chest landmarks for the LUS protocol.

|           |       |                                                                                     |
|-----------|-------|-------------------------------------------------------------------------------------|
| Anterior  | Right | R1: upper on the midclavicular line above the internipple line                      |
|           |       | R2: basal on the midclavicular line below the internipple line                      |
|           | Left  | L1: upper on the midclavicular line above the internipple line                      |
|           |       | L2: basal on the midclavicular line below the internipple line                      |
| Lateral   | Right | R3: upper on the midaxillary line above the internipple line                        |
|           |       | R4: basal on the midaxillary line below the internipple line                        |
|           | Left  | L3: upper on the midaxillary line above the internipple line                        |
|           |       | L4: basal on the midaxillary line below the internipple line                        |
| Posterior | Right | R5: upper on the paravertebral line above the inferior angle of shoulder blade line |
|           |       | R6: basal on the paravertebral line below the inferior angle of shoulder blade line |
|           | Left  | L5: upper on the paravertebral line above the inferior angle of shoulder blade line |
|           |       | L6: basal on the paravertebral line below the inferior angle of shoulder blade line |

**Table S2.** LUS scoring.

|                        |   |                                                                                                                                                                                                                      |
|------------------------|---|----------------------------------------------------------------------------------------------------------------------------------------------------------------------------------------------------------------------|
| B-lines                | 0 | No B-lines. A-lines (normal reverberation artifacts of the pleural line that when accompanied by lung sliding correspond to normal aeration of the lung)                                                             |
|                        | 1 | A-B lines                                                                                                                                                                                                            |
|                        | 2 | B-lines (hyperechoic lines vertical to the pleura line, arising from it and reaching the edge of the screen erasing A-lines, which represent reverberation artifact through edematous interlobular septa or alveoli) |
|                        | 3 | White lung (coalescent B-lines that correspond to severe lung aeration loss)                                                                                                                                         |
| Lung consolidation     | 0 | No consolidation                                                                                                                                                                                                     |
|                        | 1 | Small subpleurical consolidation                                                                                                                                                                                     |
|                        | 2 | Low-grade lung hepatization                                                                                                                                                                                          |
|                        | 3 | High-grade lung hepatization                                                                                                                                                                                         |
| Pleural line integrity | 0 | Intact pleural line                                                                                                                                                                                                  |
|                        | 1 | Pleural thickening                                                                                                                                                                                                   |
|                        | 2 | Irregular pleural line                                                                                                                                                                                               |
|                        | 3 | Interrupted pleural line                                                                                                                                                                                             |
| Pleural effusion       | 0 | No pleural effusion                                                                                                                                                                                                  |
|                        | 1 | Low-grade pleural effusion                                                                                                                                                                                           |
|                        | 2 | Medium-grade pleural effusion                                                                                                                                                                                        |
|                        | 3 | High-grade pleural effusion                                                                                                                                                                                          |
